# Supplementary material for: HTK vs. HTK-N for Coronary Endothelial Protection during Hypothermic, Oxygenated Perfusion of Hearts Donated after Circulatory Death
Source: MDPI journal article supplement (doi:10.3390/ijms25042262), 2024-02-13
Supplement: s1 [file s1]

**Supplementary Table S1.** Composition of the maintenance solutions. HTK: histidine-tryptophane-ketoglutarate. HTK-N: Histidine-tryptophane-ketoglutarat-N.

|                                | HTK   | HTK-N  |
|--------------------------------|-------|--------|
| <b>Electrolytes</b>            |       |        |
| Na <sup>+</sup>                | 16    | 16     |
| K <sup>+</sup>                 | 10    | 10     |
| Mg <sup>2+</sup>               | 4     | 8      |
| Ca <sup>2+</sup>               | 0.015 | 0.020  |
| Cl <sup>-</sup>                | 50    | 30     |
| <b>Buffer substances</b>       |       |        |
| Histidine                      | 198   | 124    |
| N $\alpha$ -acetyl-L-histidine | -     | 57     |
| <b>Further amino acids</b>     |       |        |
| Tryptophan                     | 2     | 2      |
| $\alpha$ -Ketoglutarate        | 1     | 2      |
| Aspartate                      | -     | 5      |
| Arginine                       | -     | 3      |
| Alanine                        | -     | 5      |
| Glycine                        | -     | 10     |
| <b>Oncotic agents</b>          |       |        |
| Mannitol                       | 30.0  | -      |
| <b>Sugars</b>                  |       |        |
| Sucrose                        | -     | 33     |
| <b>Iron chelators</b>          |       |        |
| Deferoxamine                   | -     | 0.025  |
| LK-614                         | -     | 0.0075 |

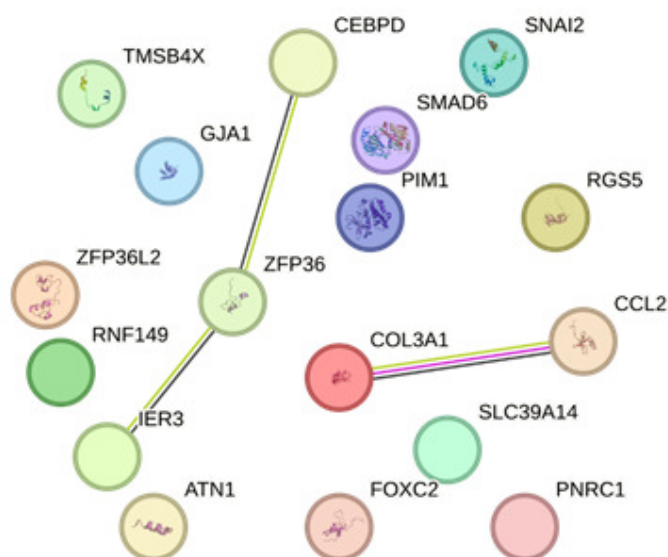

**Supplementary Figure S1.** Network analysis of the top 20 upregulated genes of HTK-N vs. HTK. The network was built utilizing the Gene String online tool. HTK: Histidine-tryptophane-ketoglutarate. HTK-N: Histidine-tryptophane-ketoglutarate-N.
